# Supplementary material for: SARS-CoV-2 Spike Protein Stimulates Macropinocytosis in Murine and Human Macrophages via PKC-NADPH Oxidase Signaling
Source: MDPI journal article supplement (doi:10.3390/antiox13020175), 2024-01-30
Supplement: s1 [file s1]

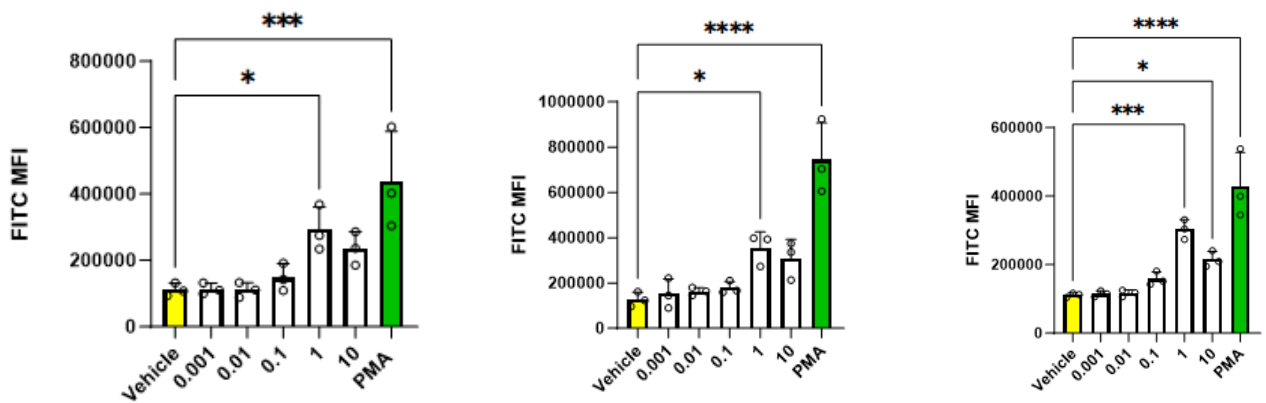

**Supplementary Figure S1. Quantification of macrophage FITC-dextran uptake in response to Recombinant SARS-CoV-2 spike protein treatment.** Murine bone marrow-derived macrophages were incubated with FITC-dextran (100  $\mu\text{g/ml}$ ) and treated with vehicle (PBS) or with different concentrations (0.001  $\mu\text{g/ml}$  – 10  $\mu\text{g/ml}$ ) of the spike protein subunits S1 (A), RBD (B), and S2 (C) for 4 hours. Data are presented as means  $\pm$  SD. \* $P < 0.05$ ; \*\*\* $P < 0.001$ ; \*\*\*\* $P < 0.0001$ . P values were calculated using one-way ANOVA with Tukey’s test for multiple comparisons.
